# Supplementary material
Source: PubMed Central journal article supplement (PMC5913982)
Supplement: AAC.02388-17_zac004187011s1.pdf [file AAC.02388-17_zac004187011s1.pdf]

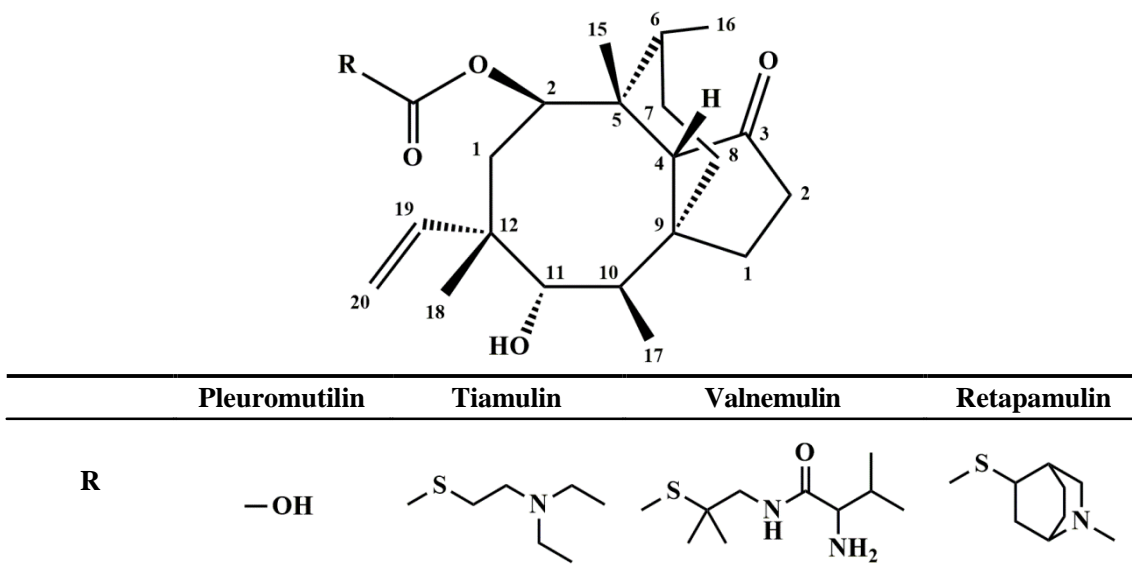

**Figure S1** Chemical structures of the pleuromutilins

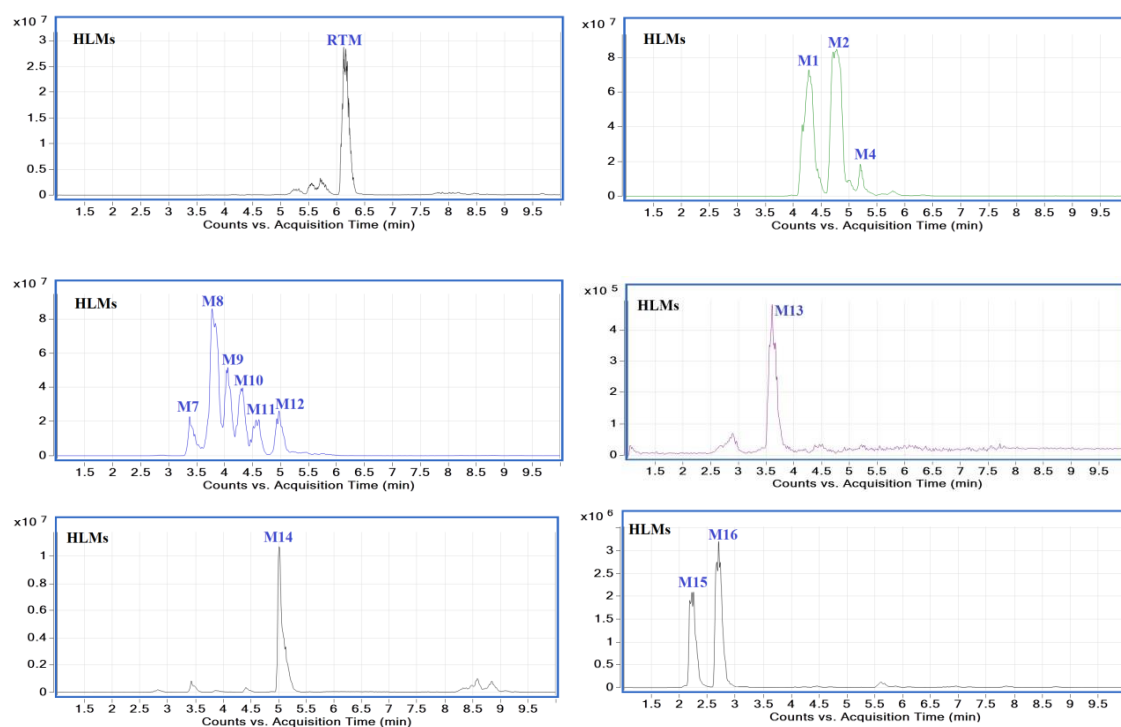

**Figure S2** Accurate extracted ion chromatograms (EICs) of retapamulin and its metabolites after incubation with human liver microsomes.

**Table S3** Summary of metabolites of RTP detected in *in vivo* and *in vitro*

| NO. | Description        | Composition                                                    | [M+H] <sup>+</sup><br>( <i>m/z</i> ) | Error<br>(ppm) | Corresponding<br>mass errors (ppm) |
|-----|--------------------|----------------------------------------------------------------|--------------------------------------|----------------|------------------------------------|
| M0  | RTP                | C <sub>30</sub> H <sub>48</sub> NO <sub>4</sub> S <sup>+</sup> | 518.32986                            | 0.40           | 0.77                               |
| M1  | 8 $\alpha$ -OH-RTP | C <sub>30</sub> H <sub>48</sub> NO <sub>5</sub> S <sup>+</sup> | 534.32477                            | 0.06           | 0.11                               |
| M2  | RTP+O              | C <sub>30</sub> H <sub>48</sub> NO <sub>5</sub> S <sup>+</sup> | 534.32477                            | 0.12           | 0.22                               |
| M3  | RTP+O              | C <sub>30</sub> H <sub>48</sub> NO <sub>5</sub> S <sup>+</sup> | 534.32477                            | 0.43           | 0.80                               |
| M4  | RTP+O              | C <sub>30</sub> H <sub>48</sub> NO <sub>5</sub> S <sup>+</sup> | 534.32477                            | 0.51           | 0.95                               |
| M5  | RTP+O              | C <sub>30</sub> H <sub>48</sub> NO <sub>5</sub> S <sup>+</sup> | 534.32477                            | 0.36           | 0.67                               |
| M6  | Sulfoxide RTP      | C <sub>30</sub> H <sub>48</sub> NO <sub>5</sub> S <sup>+</sup> | 534.32477                            | 0.34           | 0.64                               |
| M7  | RTP+2O             | C <sub>30</sub> H <sub>48</sub> NO <sub>6</sub> S <sup>+</sup> | 550.31969                            | 0.32           | 0.58                               |
| M8  | RTP+2O             | C <sub>30</sub> H <sub>48</sub> NO <sub>6</sub> S <sup>+</sup> | 550.31969                            | 0.32           | 0.58                               |
| M9  | RTP+2O             | C <sub>30</sub> H <sub>48</sub> NO <sub>6</sub> S <sup>+</sup> | 550.31969                            | 0.41           | 0.75                               |
| M10 | RTP+2O             | C <sub>30</sub> H <sub>48</sub> NO <sub>6</sub> S <sup>+</sup> | 550.31969                            | 0.52           | 0.94                               |
| M11 | RTP+2O             | C <sub>30</sub> H <sub>48</sub> NO <sub>6</sub> S <sup>+</sup> | 550.31969                            | 0.36           | 0.65                               |
| M12 | RTP+2O             | C <sub>30</sub> H <sub>48</sub> NO <sub>6</sub> S <sup>+</sup> | 550.31969                            | 0.07           | 0.13                               |
| M13 | RTP+3O             | C <sub>30</sub> H <sub>48</sub> NO <sub>7</sub> S <sup>+</sup> | 566.31460                            | 0.51           | 0.90                               |
| M14 | N-deethyl-RTP      | C <sub>29</sub> H <sub>46</sub> NO <sub>4</sub> S <sup>+</sup> | 504.31421                            | 0.03           | 0.06                               |
| M15 | N-deethyl-RTP+O    | C <sub>29</sub> H <sub>46</sub> NO <sub>5</sub> S <sup>+</sup> | 520.30912                            | 0.02           | 0.04                               |
| M16 | N-deethyl-RTP+O    | C <sub>29</sub> H <sub>46</sub> NO <sub>5</sub> S <sup>+</sup> | 520.30912                            | 0.04           | 0.08                               |

The [M+H]<sup>+</sup> (*m/z*) values were calculated from the proposed structural formulae. The Error (ppm) is the difference between the calculated and observed *m/z* values.
